# Supplementary material for: Intelligenzmessung in drei Minuten – Evaluation des mini-q und Konstruktion einer Parallelversion
Source: Atypon-hosted journal article supplement (doi:10.1024/1010-0652/a000384), 2024-04-22
Supplement: 1010-0652_a000384_esm1.pdf [file 1010-0652_a000384_esm1.pdf]

## Elektronisches Supplement 1

| A Beispiel |                                 |       | richtig                             | falsch                              |
|------------|---------------------------------|-------|-------------------------------------|-------------------------------------|
| 1.         | Das Dreieck zieht den Kreis vor | ■ ▲ ● | <input checked="" type="checkbox"/> | <input type="checkbox"/>            |
| 2.         | Das Dreieck lehnt den Kreis ab  | ● ▲ ■ | <input type="checkbox"/>            | <input checked="" type="checkbox"/> |

  

| B Beispiel |                              |       | richtig                             | falsch                              |
|------------|------------------------------|-------|-------------------------------------|-------------------------------------|
| 1.         | Der Pfeil zieht den Stern an | ◆ ↑ ★ | <input checked="" type="checkbox"/> | <input type="checkbox"/>            |
| 2.         | Der Pfeil stößt den Stern ab | ★ ↑ ◆ | <input type="checkbox"/>            | <input checked="" type="checkbox"/> |

**Abbildung E1.** Jeweils zwei korrekt gelöste Items aus der Instruktion des *mini-q* (oberes Beispiel A; Baudson & Preckel, 2016, S. 183) und des *mini-q B* (unteres Beispiel B).
